# Supplementary material
Source: HighWire-hosted journal article supplement (https://qdcxjkg.com/highwire/filestream/129986/field_highwire_adjunct_files/2/ERJ-01485-2015_online_supplement.pdf)
Supplement: ERJ-01485-2015_online_supplement.pdf [file ERJ-01485-2015_online_supplement.pdf]

## ONLINE SUPPLEMENT

### METHODS

#### PROMISE study

The study was performed at 11 European tertiary respiratory centers from November 2008 to October 2011, was approved by the corresponding ethical committees and registered as the PROMISE-COPD study (ISRCTN99586989). Written informed consent was obtained from all patients prior to inclusion. Patients were required to: 1) fulfill criteria of the Global Initiative for Chronic Obstructive Lung Disease grade II to IV (post-bronchodilator forced expiratory volume in one second/forced vital capacity < 70% and forced expiratory volume in one second < 80% predicted); 2) be clinically stable for more than four weeks; 3) be at least 40 years of age and 4) have a smoking history of at least 10 pack years. Patients were excluded from the study if: 1) the main respiratory disorder was not COPD; 2) death was expected within 6 months; 3) the patient was immunosuppressed, including human immunodeficiency virus infection, organ transplantation or chronic steroids use (above 20 mg prednisolone equivalent per day) or 4) a musculoskeletal or neuromuscular disorder prevented ambulation. Study visits included a physical examination, registration of vital signs, assessment of a detailed history and questionnaire. Spirometry and six minute walking distance tests were performed according to the American Thoracic Society guidelines (1, 2). The assessment of BODE, mMRC (modified Medical Research Council) dyspnea scale and SGRQ (St. George's Respiratory Questionnaire) were performed as described previously (3, 4). Additional visits were scheduled at every exacerbation and four weeks after the exacerbation. Exacerbations not reported and treated at a different health care facility were registered at every standard study visit. The study protocol did not influence COPD management or any other therapy. Outcomes of interest were confirmed at the time of study visits. The patients were contacted if they did not make it to the scheduled appointment. If multiple attempts failed relatives, physicians or insurance

providers were contacted. Patients included in the study center Basel were approached five years after study inclusion to assess survival status.

#### PROCOLD study

Patients with hospitalized for AECOPD in the University Hospital Basel (Switzerland) were recruited from November 2003 to March 2005. Patients were included if they 1) met the definition of severe AECOPD, 2) were older than 40 years, 3) met spirometric COPD criteria and 4) provided a written informed consent. Immunosuppressed patients, patients with asthma, cystic fibrosis or radiographic infiltrates were not included. The study was approved by the institutional review board and registered as the PROCOLD study (ISRCTN77261143). The primary study objective was to improve antibiotic prescription at AECOPD as reported previously (5). At study inclusion baseline data, including medical history, clinical assessment, blood tests and lung function were performed. A short-term follow up was performed after 14 to 21 days and a long-term follow up after six months. Two years after study inclusion survival status was assessed.

#### COCOMICS

The COCOMICS study is a pooled analysis of individual patient-data from 11 Spanish COPD cohorts as reported previously (6). Principal investigators provided data sets from several COPD cohorts (Requena II (7), Sevilla (8), Tenerife (9), Zaragoza (10) and Terrassa I-III (11, 12)) with baseline parameters as well as follow up and outcome of each participating patient.

#### COMIC

COMIC was a single-center cohort study performed in Enschede (The Netherlands) from December 2005 to April 2010 (13). Patients were included if they met following criteria 1) diagnostic criteria of COPD according to the GOLD guidelines, 2) current or previous smoker, 3) age above 40 years, 4) no other medical condition compromising survival within the three year follow up, 5) no serious psychiatric illness, 6) no other active lung disease, 7) no antibiotic maintenance therapy and 8) ability

to speak Dutch. Patients were enrolled at stable or exacerbated COPD. Baseline characteristics were assessed at study inclusion or in the case of exacerbation as soon as they reached clinical stability.

#### Copeptin measurements

Copeptin was measured in 50µL serum using a sandwich immunoluminometric assay using 2 polyclonal antibodies to amino acids 132 to 164 of preprovasopressin (CT-proAVP LIA; BRAHMS AG, Henningsdorf/Berlin, Germany). The lower detection limit was 0.4 pmol/L, and the functional assay sensitivity (< 20% interassay coefficient of variation) was less than 1 pmol/L (14, 15). A median copeptin level of 4.2pmol/L (95% confidence interval [CI], 4.0-4.4 pmol/L) was measured in healthy individuals, previously (14).

## REFERENCES

1. Brusasco V, Crapo R, Viegi G, American Thoracic Society, European Respiratory Society. Coming together: the ATS/ERS consensus on clinical pulmonary function testing. *Eur Respir J* 2005;26:1–2.
2. Crapo RO, Casaburi R, Coates AL, Enright PL, MacIntyre NR, McKay RT, Johnson D, Wanger JS, Zeballos RJ, Bittner V, Mottram C, Comm A. ATS statement: Guidelines for the six-minute walk test. *Am J Respir Crit Care Med* 2002;166:111–117.
3. Celli BR, Cote CG, Marín JM, Casanova C, Montes de Oca M, Mendez RA, Pinto-Plata V, Cabral HJ. The body-mass index, airflow obstruction, dyspnea, and exercise capacity index in chronic obstructive pulmonary disease. *N Engl J Med* 2004;350:1005–1012.
4. Bestall JC, Paul EA, Garrod R, Garnham R, Jones PW, Wedzicha JA. Usefulness of the Medical Research Council (MRC) dyspnoea scale as a measure of disability in patients with chronic obstructive pulmonary disease. *Thorax* 1999;54:581–586.
5. Stolz D, Christ-Crain M, Bingisser R, Müller C, Huber P, Müller B, Tamm M. Antibiotic treatment of exacerbations of COPD: a randomized, controlled trial comparing procalcitonin-guidance with standard therapy. *Chest* 2007;131:9–19.
6. Marín JM, Alfageme I, Almagro P, Casanova C, Esteban C, Soler-Cataluna JJ, de Torres JP, Martínez-Cambor P, Miravittles M, Celli BR, Soriano JB. Multicomponent indices to predict survival in COPD: the COCOMICS study. *Eur Respir J* 2013;42:323–332.
7. Soler-Cataluña JJ, Martínez-García MA, Román Sánchez P, Salcedo E, Navarro M, Ochando R. Severe acute exacerbations and mortality in patients with chronic obstructive pulmonary disease. *Thorax* 2005;60:925–931.

8. Alfageme I, Reyes N, Merino M, Reina A, Gallego J, Lima J, Palacios Z. The effect of airflow limitation on the cause of death in patients with COPD. *Chron Respir Dis* 2010;7:135–145.
9. Casanova C, Cote C, de Torres JP, Aguirre-Jaime A, Marín JM, Pinto-Plata V, Celli BR. Inspiratory-to-total lung capacity ratio predicts mortality in patients with chronic obstructive pulmonary disease. *Am J Respir Crit Care Med* 2005;171:591–597.
10. Marín JM, Soriano JB, Carrizo SJ, Boldova A, Celli BR. Outcomes in patients with chronic obstructive pulmonary disease and obstructive sleep apnea: the overlap syndrome. *Am J Respir Crit Care Med* 2010;182:325–331.
11. Almagro P, Calbo E, Ochoa de Echagüen A, Barreiro B, Quintana S, Heredia JL, Garau J. Mortality after hospitalization for COPD. *Chest* 2002;121:1441–1448.
12. Almagro P, Salvadó M, Garcia-Vidal C, Rodriguez-Carballeira M, Delgado M, Barreiro B, Heredia JL, Soriano JB. Recent improvement in long-term survival after a COPD hospitalisation. *Thorax* 2010;65:298–302.
13. Zuur-Telgen MC, Brusse-Keizer MGJ, Vandervalk PDLPM, van der Palen J, Kerstjens HAM, Hendrix MGR. Stable state MR-proadrenomedullin level is a strong predictor for mortality in COPD patients. *Chest* 2013;145:534–541.
14. Morgenthaler NG, Struck J, Alonso C, Bergmann A. Assay for the measurement of copeptin, a stable peptide derived from the precursor of vasopressin. *Clin Chem* 2006;52:112–119.
15. Morgenthaler NG, Struck J, Jochberger S, Dünser MW. Copeptin: clinical use of a new biomarker. *Trends Endocrinol Metab* 2008;19:43–49.

## E-TABLES

**Table E1: Univariate cox regression for predicting 2-year all-cause mortality (PROMISE; n = 460).**

AECOPD denotes acute exacerbations of COPD, BMI body mass index, CI confidence interval, FEV<sub>1</sub> forced expiratory volume in one second, GOLD Global Initiative for Obstructive Lung Disease, HR hazard ratio, mMRC modified Medical Research Council dyspnea scale, SGRQ St George's Respiratory Questionnaire.

| Parameters                            | HR (95% CI)      | p value           |
|---------------------------------------|------------------|-------------------|
| Age, years/10                         | 1.52 (1.12-2.07) | <b>0.007</b>      |
| Gender, female                        | 1.35 (0.78-2.35) | 0.3               |
| BMI, kg/m <sup>2</sup>                | 0.91 (0.86-0.97) | <b>0.002</b>      |
| Current smoker                        | 1.54 (0.89-2.66) | 0.12              |
| AECOPDs year before inclusion         | 1.10 (1.00-1.21) | 0.055             |
| Severe AECOPDs year before inclusion  | 2.19 (1.51-3.17) | <b>&lt; 0.001</b> |
| FEV <sub>1</sub> , %predicted/10      | 0.78 (0.66-0.93) | <b>0.005</b>      |
| GOLD grade (1, 2, 3, 4)               | 1.49 (1.06-2.09) | <b>0.023</b>      |
| GOLD combined assessment (A, B, C, D) |                  | 0.076             |
| mMRC dyspnea score                    | 1.83 (1.45-2.31) | <b>&lt; 0.001</b> |
| 6-minute walking distance, m/50       | 0.94 (0.91-0.96) | <b>&lt; 0.001</b> |
| SGRQ, total score/10                  | 1.38 (1.19-1.59) | <b>&lt; 0.001</b> |
| Copeptin at inclusion, pmol/L/10      | 1.16 (1.09-1.24) | <b>&lt; 0.001</b> |

**Table E2: Multivariate cox regression models for predicting 2-year all-cause mortality (PROMISE; n**

**= 460).** AECOPD denotes acute exacerbations of COPD, BMI body mass index, CI confidence interval, FEV<sub>1</sub> forced expiratory volume in one second, HR hazard ratio, mMRC modified Medical Research Council dyspnea scale.

| Parameters                           | HR (95% CI)      | p value           | C-statistic      |
|--------------------------------------|------------------|-------------------|------------------|
| Parameters of the BODE index         |                  |                   |                  |
| BMI, kg/m <sup>2</sup>               | 0.91 (0.86-0.97) | <b>0.004</b>      |                  |
| FEV <sub>1</sub> , %predicted/10     | 1.08 (0.88-1.33) | 0.5               |                  |
| mMRC dyspnea score                   | 1.38 (1.01-1.88) | <b>0.042</b>      | 0.73 (0.64-0.81) |
| 6-minute walking distance, m/50      | 0.94 (0.92-0.97) | <b>&lt; 0.001</b> |                  |
| Parameters of the ADO index          |                  |                   |                  |
| Age, years/10                        | 1.64 (1.20-2.26) | <b>0.002</b>      |                  |
| mMRC dyspnea score                   | 1.81 (1.40-2.34) | <b>&lt; 0.001</b> | 0.72 (0.64-0.80) |
| FEV <sub>1</sub> , %predicted/10     | 0.88 (0.73-1.05) | 0.2               |                  |
| Parameters of the DOSE index         |                  |                   |                  |
| mMRC dyspnea score                   | 1.82 (1.41-2.35) | <b>&lt; 0.001</b> |                  |
| FEV <sub>1</sub> , %predicted/10     | 0.87 (0.73-1.03) | 0.11              |                  |
| Current smoker                       | 1.70 (0.98-2.97) | 0.060             | 0.71 (0.63-0.78) |
| AECOPDs year before inclusion        | 0.94 (0.79-1.12) | 0.5               |                  |
| Parameters of the B-AE-D-C index     |                  |                   |                  |
| BMI, kg/m <sup>2</sup>               | 0.90 (0.85-0.96) | <b>0.001</b>      |                  |
| Severe AECOPDs year before inclusion | 1.90 (1.28-2.82) | <b>0.001</b>      | 0.76 (0.69-0.81) |
| mMRC dyspnea score                   | 1.71 (1.34-2.17) | <b>&lt; 0.001</b> |                  |

Copeptin at inclusion, pmol/L/10                      1.21 (1.12-1.30)                      < 0.001

**Table E3: Performance of B-AE-D and B-AE-D-C parameters plus additional predictors to predict 2-year all-cause mortality (PROMISE; n = 460).** Age, gender, smoking status or six minute walking distance was added to the parameters of B-AE-D and B-AE-D-C. The c-statistic of every cox regression model for predicting 2-year all-cause mortality is presented. FEV<sub>1</sub> denotes forced expiratory volume in one second. B-AE-D-C (body mass index, severe exacerbation frequency, dyspnea, copeptin)

|          | ALONE | +Age  | +Gender | +FEV <sub>1</sub> ,<br>%predicted | +Smoking<br>status | +6-minute<br>walking dist. |
|----------|-------|-------|---------|-----------------------------------|--------------------|----------------------------|
| B-AE-D   | 0.725 | 0.727 | 0.727   | 0.727                             | 0.730              | 0.732                      |
| B-AE-D-C | 0.763 | 0.768 | 0.765   | 0.764                             | 0.769              | 0.758                      |

**Table E4: Regression coefficients and development of optimized B-AE-D and B-AE-D-C indices (PROMISE; n = 460).** Cox regression model for predicting 2-year all-cause mortality. Regression coefficients were multiplied by the factor 5.95. Points were rounded to the next integer. AECOPD denotes acute exacerbations of COPD, BMI body mass index, mMRC modified Medical Research Council dyspnea scale.

|                                     | Category  | Regression<br>coefficients | Risk<br>score |
|-------------------------------------|-----------|----------------------------|---------------|
| BMI, kg/m <sup>2</sup>              | ≥21       | -                          | 0             |
|                                     | 18.5 - 21 | 0.97                       | 6             |
|                                     | <18.5     | 1.45                       | 9             |
| Severe<br>AECOPDs, per<br>year      | 0         | -                          | 0             |
|                                     | 1         | 0.45                       | 3             |
|                                     | ≥2        | 1.22                       | 7             |
| mMRC dyspnea<br>score               | 0 - 2     | -                          | 0             |
|                                     | 3         | 0.97                       | 6             |
|                                     | 4         | 1.67                       | 10            |
| Copeptin at<br>inclusion,<br>pmol/L | <20       | -                          | 0             |
|                                     | 20 - 40   | 0.50                       | 3             |
|                                     | ≥40       | 1.58                       | 9             |

**Table E5: Baseline characteristics of 530 stable COPD patients (PROMISE).** AECOPD denotes acute exacerbations of COPD, BMI body mass index, FEV<sub>1</sub> forced expiratory volume in one second, FVC forced vital capacity, GOLD Global Initiative for Obstructive Lung Disease, mMRC modified Medical Research Council dyspnea scale, NPPV non-invasive positive pressure ventilation, SGRQ St. George’s

## Respiratory Questionnaire.

|                                               |           |
|-----------------------------------------------|-----------|
| Age, years                                    | 67 ±10    |
| Gender, female                                | 159 (30%) |
| Height, cm                                    | 168 ±8    |
| Weight, kg                                    | 74 ±17    |
| BMI, kg/m <sup>2</sup>                        | 26 ±6     |
| <b>Comorbidities</b>                          |           |
| Congestive heart disease                      | 81 (15%)  |
| Coronary artery disease                       | 125 (24%) |
| Previous myocardial infarction                | 55 (10%)  |
| Arterial hypertension                         | 273 (52%) |
| Peripheral vascular disease                   | 59 (11%)  |
| Cerebrovascular disease                       | 25 (5%)   |
| Gastric ulcer                                 | 41 (8%)   |
| Diabetes mellitus                             | 69 (13%)  |
| Renal disease                                 | 37 (7%)   |
| Malignancy                                    | 24 (5%)   |
| Osteoporosis                                  | 63 (12%)  |
| Liver disease                                 | 25 (5%)   |
| Pulmonary hypertension                        | 55 (10%)  |
| Depression                                    | 81 (15%)  |
| Alcohol abuse                                 | 46 (9%)   |
| Adjusted Charlson comorbidity index           | 4.2 ±1.9  |
| <b>COPD history</b>                           |           |
| Current smoker                                | 167 (32%) |
| Pack years smoked                             | 50 ±30    |
| COPD symptoms, months                         | 103 ±88   |
| AECOPDs year before inclusion, numbers        | 0.90 ±1.4 |
| Severe AECOPDs year before inclusion, numbers | 0.5 ±0.8  |
| <b>Lung function parameters</b>               |           |
| FEV <sub>1</sub> , % predicted                | 49 ±17    |
| FVC, % predicted                              | 78 ±25    |
| FEV <sub>1</sub> /FVC, %                      | 48 ±14    |
| <b>COPD assessment</b>                        |           |
| GOLD grade 2                                  | 257 (49%) |
| grade 3                                       | 182 (34%) |
| grade 4                                       | 88 (17%)  |
| GOLD combined assessment group A              | 47 (9%)   |
| combined assessment group B                   | 162 (31%) |
| combined assessment group C                   | 23 (4%)   |
| combined assessment group D                   | 287 (54%) |
| mMRC dyspnea score                            | 2.7 ±1.1  |
| 6-minute walking distance, m                  | 377 ±108  |
| SGRQ, total score                             | 43 ±19    |
| Copeptin at inclusion, pmol/L                 | 13 ±18    |
| <b>COPD therapy at study inclusion</b>        |           |
| Inhaled anticholinergics, short acting        | 123 (23%) |
| Inhaled anticholinergics, long acting         | 358 (68%) |
| Inhaled β <sub>2</sub> agonists, short acting | 235 (44%) |
| Inhaled β <sub>2</sub> agonists, long acting  | 446 (84%) |
| Inhaled corticosteroids                       | 432 (82%) |
| Systemic corticosteroids                      | 30 (6%)   |
| Theophylline                                  | 51 (10%)  |
| Mucolytics                                    | 58 (11%)  |
| Long term oxygen therapy                      | 97 (18%)  |
| Nocturnal NPPV                                | 21 (4%)   |
| Previous lung volume reduction surgery        | 22 (4%)   |
| Current pulmonary rehabilitation              | 128 (24%) |



**Table E6: Characteristics of the validation cohorts PROCOLD, COCOMICS and COMIC.** AECOPD

denotes acute exacerbations of COPD, BMI body mass index, FEV<sub>1</sub> forced expiratory volume in one second, mMRC modified Medical Research Council dyspnea scale.

|                                               | PROCOLD  | COCOMICS   |          |          |             |            |             |              | TOTAL    | COMIC     |
|-----------------------------------------------|----------|------------|----------|----------|-------------|------------|-------------|--------------|----------|-----------|
|                                               |          | Requena II | Sevilla  | Tenerife | Zaragoza II | Terrassa I | Terrassa II | Terrassa III |          |           |
| Status at inclusion                           | AECOPD   | Stable     | Stable   | Stable   | Stable      | AECOPD     | AECOPD      | AECOPD       |          | Stable    |
| Numbers                                       | 160      | 152        | 596      | 214      | 859         | 131        | 60          | 141          | 2153     | 675       |
| Age, years                                    | 71 ±10   | 71 ±9      | 66 ±10   | 63 ±9    | 63 ±10      | 72 ±9      | 71 ±9       | 72 ±9        | 66 ±10   | 67 ±10    |
| Gender, female                                | 71 (44%) | 1 (1%)     | 32(5%)   | 54 (24%) | 59 (7%)     | 11 (8%)    | 1 (2%)      | 8 (6%)       | 157 (7%) | 267 (40%) |
| BMI, kg/m <sup>2</sup>                        | 25 ±5    | 28 ±5      | 29 ±6    | 27 ±5    | 27 ±5       | 26 ±5      | 26 ±4       | 28 ±5        | 28 ±5    | 27 ±5     |
| FEV <sub>1</sub> , % predicted                | 41 ±18   | 43 ±16     | 44 ±13   | 54 ±20   | 62 ±21      | 42 ±13     | 31 ±13      | 45 ±14       | 52 ±20   | 53 ±19    |
| mMRC dyspnea score                            |          | 3.2 ±1.0   | 2.4 ±1.0 | 2.1 ±1.2 | 2.7 ±1.1    | 3.4 ±1.3   | 3.0 ±1.0    | 3.8 ±1.2     | 2.7 ±1.2 | 1.8 ±1.3  |
| Severe AECOPDs year before inclusion, numbers | 2.0 ±1.3 | 0.7 ±1.0   | 1.2 ±1.9 | 0.4 ±0.7 | 1.1 ±2.4    | 1.0 ±1.4   | 1.8 ±1.3    | 1.4 ±2.2     | 1.0 ±2.0 | 0.18 ±53  |

**Table E7: B-AE-D performance in individual COCOMICS cohorts.** B-AE-D (body mass index, severe exacerbation frequency, dyspnea).

| C statistic of B-AE-D for predicting | Requena II | Sevilla | Tenerife | Zaragoza II | Terrassa I | Terrassa II | Terrassa III | TOTAL       |
|--------------------------------------|------------|---------|----------|-------------|------------|-------------|--------------|-------------|
| 1-year all-cause mortality           | 0.74       | 0.59    | 0.66     | 0.62        | 0.74       | 0.59        | 0.62         | <b>0.68</b> |
| 2-year all-cause mortality           | 0.68       | 0.58    | 0.65     | 0.63        | 0.69       | 0.57        | 0.60         | <b>0.65</b> |
| 3-year all-cause mortality           | 0.64       | 0.56    | 0.62     | 0.64        | 0.67       | 0.57        | 0.63         | <b>0.63</b> |

## E-FIGURES

**Figure E1:** Study flow diagram of PROMISE. AECOPD denotes acute exacerbations of COPD, BMI body mass index, mMRC modified Medical Research Council dyspnea scale.

**Figure E2:** Study flow diagrams of PROCOLD, COCOMICS and COMIC. AECOPD denotes acute exacerbations of COPD, BMI body mass index, mMRC modified Medical Research Council dyspnea scale.
